# Supplementary material
Source: Royal Society of Chemistry journal article supplement (doi:10.1039/d6dt00622a)
Supplement: d6dt00622a1.pdf [file d6dt00622a1.pdf]

## Supplementary data

### **Structural, optical, and electrochemical properties of a new 1D copper (II) halometalate for highly sensitive dopamine detection**

Houyem Khelifi<sup>a</sup>, Jassem Wannassi<sup>b</sup>, Nouredine Mhadhbi<sup>a,c</sup>, Hajir Wahbi<sup>d</sup>, Jeanneau Erwann<sup>e</sup>,  
Naoufel Ben Hamadi<sup>f\*</sup>, Ahlem Guesmi<sup>f</sup>, Lotfi Khezami<sup>f</sup>, Houcine Barhoumi<sup>b</sup> and Houcine  
Naïli<sup>a\*</sup>

<sup>a</sup> *Laboratory Physical-Chemistry of the Solid State, Department of Chemistry, Faculty of Sciences of  
Sfax, B.P. 1171, Sfax 3000, University of Sfax, Tunisia*

<sup>b</sup> *Laboratory of Interfaces and Advanced Materials, Faculty of Sciences, University of Monastir, 5019  
Monastir, Tunisia*

<sup>c</sup> *University of Monastir, Preparatory Institute for Engineering Studies of Monastir, 5019 Monastir-  
Tunisia*

<sup>d</sup> *Department of Chemistry, College of Science, Northern Border University, Arar, Saudi Arabia.*

<sup>e</sup> *Centre de Diffractométrie Henri Longchambon, Université Claude Bernard Lyon1, 5 rue de La  
Doua, 69100 Villeurbanne, France*

<sup>f</sup> *Chemistry Department, College of Science, Imam Mohammad Ibn Saud Islamic University (IMSIU),  
P.O. Box 5701, Riyadh 11432, Saudi Arabia*

**Table.S1.** Experimental conditions and data collection of the  $[\text{Cu}(\kappa^2\text{-Cl})_2(\eta^1\text{-4-I-Pz})_2]_n$  crystal.

| <b>Crystal Data</b>                       |                                                          |
|-------------------------------------------|----------------------------------------------------------|
| Empirical formula                         | $\text{C}_6\text{H}_6\text{Cl}_2\text{CuI}_2\text{N}_4$  |
| Formula weight ( $\text{g mol}^{-1}$ )    | 522.39                                                   |
| Temperature (K)                           | 100                                                      |
| Crystal system                            | Monoclinic                                               |
| Space group                               | $P2_1/c$                                                 |
| a (Å), b (Å), c (Å)                       | 4.0114 (1), 15.0996 (6), 10.0000 (3)                     |
| $\beta$ (°)                               | 93.599 (3)                                               |
| Volume (Å <sup>3</sup> )                  | 604.51 (3)                                               |
| Z                                         | 2                                                        |
| Calculated density ( $\text{Mg m}^{-3}$ ) | 1.136                                                    |
| $\mu$ ( $\text{mm}^{-1}$ )                | 7.33                                                     |
| F(000)                                    | 478                                                      |
| Crystal size (mm)                         | $0.24 \times 0.11 \times 0.05$                           |
| Color/Form                                | Yellow/Plate                                             |
| <b>Data Collection</b>                    |                                                          |
| Diffractometer                            | XtaLAB Synergy, Dualflex, HyPix-Arc 100                  |
| Radiation                                 | Mo $K\alpha$ ( $\lambda = 0.71073$ Å)                    |
| $\theta$ range (°)                        | 3.4–30.5°                                                |
| Index ranges                              | $-5 \leq h \leq 5, 0 \leq k \leq 20, 0 \leq l \leq 14$   |
| Measured reflections                      | 7693                                                     |
| Independent reflections                   | 1615                                                     |
| Reflections with $I > 2\sigma(I)$         | 1446                                                     |
| Absorption correction                     | Multi-scan (SADABS; $T_{\min}=0.380, T_{\max} = 0.760$ ) |
| <b>Refinement</b>                         |                                                          |
| Refinement method                         | Full-matrix least-squares on $F^2$                       |
| Restraints/parameters                     | 6221/0/71                                                |
| Goodness-of-fit on $F^2$                  | 1.07                                                     |
| $R[F^2 > 2\sigma(F^2)]$                   | 0.030                                                    |
| $wR(F^2) [I > 2\sigma(I)]$                | 0.059                                                    |

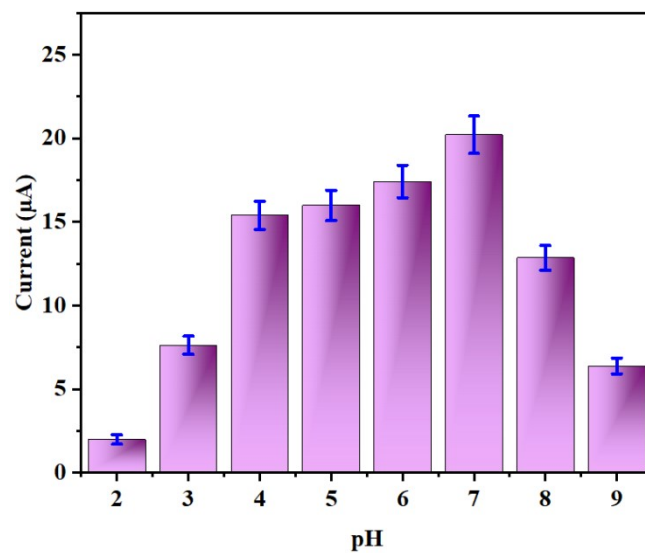

**Figure S1.** Effect of solution pH on the current response of the [4ICuCl]/GCE electrode in 0.1 M phosphate buffer solution containing 10 µM dopamine (DA).
